# Supplementary material for: Salmonella and Antimicrobial Resistance in Wild Rodents—True or False Threat?
Source: MDPI journal article supplement (doi:10.3390/pathogens9090771), 2020-09-21
Supplement: s1 [file s1]

**Table S2.** Loci and allele variants resulting in novel *E. coli* sequence types.

| MLST    | allele variants |             |             |            |            |             |             |
|---------|-----------------|-------------|-------------|------------|------------|-------------|-------------|
|         | <i>adk</i>      | <i>fumC</i> | <i>gyrB</i> | <i>icd</i> | <i>mdh</i> | <i>purA</i> | <i>recA</i> |
| ST10805 | 6               | 4           | 782         | 1267       | 11         | 239         | 7           |
| ST10806 | 76              | 568         | 247         | 36         | 17         | 14          | 28          |
| ST10810 | 18              | 22          | 16          | 23         | 5          | 138         | 4           |
| ST10824 | 6               | 19          | 14          | 16         | 11         | 12          | 156         |
