# Supplementary material for: Salmonella and Antimicrobial Resistance in Wild Rodents—True or False Threat?
Source: MDPI journal article supplement (doi:10.3390/pathogens9090771), 2020-09-21
Supplement: s1 [file s1]

**Table S1.** Chromosomal point mutations in *pmrA* and *pmrB* noted in colistin resistant strains.

| Isolate & MIC | Mutation                     | Nucleotide change                | Amino acid change |
|---------------|------------------------------|----------------------------------|-------------------|
| M22col MIC 16 | <i>pmrA</i> p.G53S           | GGG -> AGC                       | G -> S            |
| M22 MIC <=1   | <i>pmrA</i> p.N222K          | AAC -> AAA                       | N -> K            |
|               | <i>pmrB</i> p.H2R            | CAT -> CGT                       | H -> R            |
|               | <i>pmrB</i> p.D283G          | GAC -> GGC                       | D -> G            |
|               | <i>pmrB</i> p.A360V          | GCA -> GTA                       | A -> V            |
| M34col MIC 16 | <i>pmrB</i> p.A159V          | GCG -> GTT                       | A -> V            |
|               | <i>pmrB</i> p.D283G          | GAC -> GGC                       | D -> G            |
| M34 MIC<=1    | <i>pmrB</i> p.Y358N          | TAC -> AAC                       | Y -> N            |
| M50 col MIC 8 | <i>pmrB</i> p.L27_F31delinsL | CTGATCAGCGTCTTC -> CT-----<br>-C | LISVF -> L        |
|               | <i>pmrB</i> p.D283G          | GAC -> GGC                       | D -> G            |
|               | <i>pmrB</i> p.Y358N          | TAC -> AAC                       | Y -> N            |
| M65col MIC 16 | <i>pmrA</i> p.T31S           | ACA -> AGC                       | T -> S            |
|               | <i>pmrA</i> p.I128N          | ATT -> AAC                       | I -> N            |
|               | <i>pmrA</i> p.G144S          | GGC -> AGC                       | G -> S            |
|               | <i>pmrB</i> p.H2R            | CAT -> CGT                       | H -> R            |
|               | <i>pmrB</i> p.L10R           | CTG -> CGG                       | L -> R            |
|               | <i>pmrB</i> p.E123D          | GAA -> GAT                       | E -> D            |
|               | <i>pmrB</i> p.D283G          | GAC -> GGC                       | D -> G            |
|               | <i>pmrB</i> p.V351I          | GTA -> ATA                       | V -> I            |
